# Diffuse retro-reflective imaging for improved video tracking of mosquitoes at human baited bednets

Vitaly Voloshin<sup>a,\*</sup>, Christian Kröner<sup>a</sup>, Chandrabhan Seniya<sup>a</sup>, Gregory P. D. Murray<sup>b</sup>, Amy Guy<sup>b</sup>, Catherine E. Towers<sup>a</sup>, Philip J. McCall<sup>b</sup>, and David P. Towers<sup>a</sup>

<sup>a</sup>School of Engineering, University of Warwick, Coventry, CV4 7AL, UK

<sup>b</sup>Liverpool School of Tropical Medicine, Pembroke Place, Liverpool, L3 5QA, UK

\*Corresponding author, v.voloshin@warwick.ac.uk

## Abstract

Robust imaging techniques for tracking insects have been essential tools in numerous laboratory and field studies on pests, beneficial insects and model systems. Recent innovations in optical imaging systems and associated signal processing have enabled detailed characterisation of nocturnal mosquito behaviour around bednets and improvements in bednet design, a global essential for protecting populations against malaria. Nonetheless, there remain challenges around ease of use for large scale *in situ* recordings and extracting data reliably in the critical areas of the bednet where the optical signal is attenuated. Here we introduce a retro-reflective screen at the back of the measurement volume, which can simultaneously provide diffuse illumination, and remove optical alignment issues whilst requiring only one-sided access to the measurement space. The illumination becomes significantly more uniform, although, noise removal algorithms are needed to reduce the effects of shot noise particularly across low intensity bednet regions. By systematically introducing mosquitoes in front and behind the bednet in lab experiments we are able to demonstrate robust tracking in these challenging areas. Overall, the retro-reflective imaging setup delivers mosquito segmentation rates in excess of 90% compared to less than 70% with back-lit systems.

## 1 Introduction

Many arthropod vectors of human infections are highly adapted to the human home and in many regions worldwide, transmission of malaria, leishmaniasis, Chagas disease, lymphatic

filariasis and tick-borne relapsing fever occurs when the vectors take blood from sleeping humans. Bednets treated with insecticide can be very effective in preventing transmission of these infections and in Africa, the factory-treated durable type of nets referred to as long-lasting insecticidal nets (LLINs), are the most effective method available and an essential element of malaria control and elimination strategies today. Increased understanding of vector behaviour at LLINs, including how different LLIN treatments affect mosquito flight around and contact with the net surface is essential for understanding LLIN modes of action [1, 2] and raises the prospect of developing more effective interventions to reduce disease transmission [3, 4].

Optical imaging techniques have been used for decades in entomological studies in diverse settings in the laboratory and field, and recently a tracking system was used to characterise in detail how *Anopheles gambiae* mosquitoes, the vectors of human malaria in sub-Saharan Africa, interact with human-occupied bednet [1, 2, 5]. Offering high spatial and temporal resolution, optical imaging has clear advantages for quantifying vector behaviour [6, 7], but their application in typical sub-Saharan Africa dwellings present particular challenges. In order to understand better how hungry host-seeking mosquitoes are affected by the bednet, or how net alterations (physical as well as chemical) might improve net performance, entomologists are most interested in visualizing activity around the sleeping space, the bednet suspended above it and the regions around this in order to examine details of approach, attack and departure [8, 9]. Hence, the inspected volume ideally needs to be 2 x 2.5 x 1.5 m (depth x width x height), which generously encompasses the space around a typical installed bednet. To avoid rapidly varying spatial resolution between the front and back of the measurement volume, telecentric approaches are desirable for both illumination and imaging and given the space constraints in sub-Saharan dwellings this leads to typically 0.5 Numerical Aperture (NA) optical systems. The bednet itself is a regular grid that occludes the mosquito images – particularly as multiple layers of netting are often used. The mesh size in the bednet is typically smaller than the mosquito, *Anopheles gambiae* are 2.5 – 3.5 mm in wing length [10], hence the mosquito images are partially occluded when the mosquito is in front or behind a bednet. Furthermore, for field studies the optical system needs to be simple to setup and robust to environmental instabilities, e.g. flexible wooden floors, as well as computationally efficient to extract the flight tracks required by entomologists.

Two and three dimensional (multi camera) imaging setups have been reported using illuminated diffuse surfaces or lamps as a background [11–13]. Combined with algorithms for tracking, two or three dimensional flight trajectories are produced from which responses to attractants or interventions can be determined via manual inspection. However, such analyses whilst of value, do not determine responses to an insecticide treated bednet, which remains the most widespread and effective intervention against disease transmission [14, 15], or with native mosquito populations. Field studies to examine mating behaviour have been reported using the setting sun as a back light with a pair of stereo cameras to give 3-D mosquito tracks over volumes of metre-scale dimensions but this imaging approach cannot

be translated to the inside of dwellings in nocturnal situations [16, 17]. Stereo or multi-camera 3D imaging provides spatial resolution that increases proportionately with the field of view [18, 19]. Millimetre scale resolution should be available over room size volumes from optically suitable surfaces, but performance will degrade with mosquito targets that vary in presentation according to angle of view of the multiple cameras. Furthermore, a minimum of two camera views are needed in each region for 3D metrology, hence to adequately map the space around a human baited bednet would require pairs of cameras for each side, the head and feet areas as well as cameras to map the space above the bednet. The entirety of the bednet surface needs to be captured as this is where mosquitoes interact with the insecticide. Hence, the test room would need to have 5 sides largely transparent in order to position the cameras outside of the room and look in (meaning modifications to the roof region where mosquitoes are known to enter via eaves), or a significantly larger sized building that would be atypical compared to sub-Saharan dwellings.

Large field of view back lit imaging systems have been reported with two parallel imaging channels to give a measurement volume of  $2 \times 2 \times 1.4$  m in total with large aperture Fresnel lenses enabling collimated illumination and telecentric imaging [5]. As part of this study, algorithms were also reported that produced flight tracks of 25 mosquitoes over hour long recording periods. Four behavioural modes were identified: swooping, visiting (the bednet), bouncing and resting [5]. The data gave insight into mosquito host seeking behaviour and quantified an individual mosquito's contact with the bednet (and hence insecticide) with the information leading to the 'barrier bednet' concept [1, 2, 20]. Despite these advances, conducting these experiments in the field is challenging. The imaging approach worked in transmission with a Fresnel lens at either end of the measurement volume, consequently 1.5 m was needed beyond the lenses at each end. The use of two Fresnel lenses per camera also generates undesirable amplitude modulation in the images in circular rings and needs very careful alignment of the two lenses with respect to each other. The unstable nature of test environments in sub-Saharan Africa dwellings means that the alignment of these large aperture Fresnel lenses needed regular adjustment.

Here we introduce an optical setup using a retro-reflective screen (RRS) to eliminate the optical alignment problems and reduce the size of the optical system. In this approach a single Fresnel lens is used per camera to both collimate the illumination and focus the light reflected from the RRS at the far end of the measurement volume. No further optical components are needed beyond the RRS. In transmission through a bednet, the light amplitude is reduced and in this reflective mode the light is attenuated through twice the number of bednet layers compared to the back-lit setup. Additional data processing steps are introduced to handle the increased range of contrast in the images, in particular, to manage the reduced contrast of the mosquito images partially obscured by layers of net. The following sections describe the optical setup and signal processing. Sets of experimental data are shown where mosquitoes are introduced into known spatial locations, e.g. in front or behind a bednet – as a means of confirming mosquito detection ability in all regions of the image. Hence,

tracking performance comparisons are made between the back-lit and RRS based imaging approaches.

Beyond bednets that provide protection to sleeping hosts, variations in chemosensory cues including carbon dioxide and volatile organic compounds from the skin are widely recognised as determining the attractiveness of individual people [21, 22]. Assessment of variation in individual attractiveness to a host-seeking mosquito is an important first step in being able to assess novel interventions, e.g. insecticide treated clothing or topical repellents, that can offer protection away from a sleeping space [23, 24]. Initial mosquito tracks are shown from the RRS based imaging system as a binary test of relative attractiveness between two individuals.

## 2 Methods

### 2.1 Optical Setup

The optical setup is shown in Figure 1. Light from an LED ring light expands over the Fresnel lens (approx. 1.4 x 1.0 m aperture, 1.2 m focal length) and is then approximately collimated to illuminate the space above the bednet and through the bednet itself. A volunteer acts as human bait lying beneath the bednet. The telecentric setup plays a key role in image formation and metrology of mosquito position. As the depth of the scene is quite large, approximately 2 metres, telecentric imaging is essential to determine the mosquito displacements accurately when located at different depths. Moreover, the collimated illumination and imaging enables neighbouring camera views to be independent and give sufficient spatial resolution over the measurement volume.

The light travels to a back wall where it is reflected back via a RRS. Whilst a number of retro-reflective materials are available, improved performance was found using 3M<sup>TM</sup> Scotchlite<sup>TM</sup> High Gain 7610 [25] obtained as a tape to be stuck to the back wall. The material contains glass beads and is based on an exposed lens material, which means it does not have a glossy surface covering but a matte appearance producing a diffuse background with scattered light over a 10° reflection cone. The RRS is placed approximately 2 m from the Fresnel lens. The reflected light re-crosses the measurement volume and is focused by the same Fresnel lens which forms a telecentric lens pair with an imaging optic mounted on the camera. This configuration allows illumination and imaging from one side of the bednet and scene and is relatively insensitive to alignment owing to the retro-reflective nature of the beads in the RRS.

Ideally the illuminating LED would be placed on axis along with the camera optic, however this is practically difficult owing to the high NA needed in both illumination and imaging at approximately 0.5. The LEDs are therefore positioned outside the camera optic's aperture leading to pairs of images from individual mosquitoes. A direct image of the mosquito is seen by the camera against the bright RRS and a shadow image is formed from

the slightly off-axis LED on the RRS. This effect enables triangulation and hence recovery of 3D mosquito position data [26] but requires complex calibration and extensive signal processing. In contrast, it has been demonstrated that 2D tracking provides entomologically useful information [1, 2, 4] and the requirement in malaria control is to rapidly test design iterations of interventions over long time periods (hours) and with sufficient repeats to give statistically reliable data. Hence, this paper targets robust 2D tracking..

For 2D tracking over the 2 m depth of field needed here only the direct image is required. The contrast of the direct image is higher than that of the shadow images due to the extended distance over which diffraction occurs for the latter. Furthermore, each LED within the ring light will form shadows in different spatial locations of the image, whereas the direct image is in the same location and becomes reinforced with each additional LED. A custom ring light source was constructed with 12 OSRAM<sup>TM</sup> SFH 4235 infrared LEDs (peak wavelength 850 nm) [27]. The wavelength provides good sensitivity for monochrome silicon based detectors and there is no evidence from previous back-lit experiments that the direction of the illumination and orientation of the human bait affected mosquito behaviour [1, 6].

The inset in Figure 1 shows a photograph of the ring light and mounting arrangement via an optical rail that allows independent adjustment of LED plane with respect to the camera. RRS based imaging experiments were conducted with 12 MPixel cameras, either Ximea CB120RG-CM or Dalsa FA-80-12M1H, operating at 50 fps and with 14 mm focal length camera lenses. The optical system is approximately telecentric, with the deviations coming from the steps in the Fresnel lens (which makes such a large aperture lens physically manageable) and the RRS which gives a cone of reflected light, partly compensated by closing the camera lens aperture to typically F8.0. The lens combination gives approximately 0.5 mm per pixel which gives adequate sampling of the *Anopheles gambiae* mosquito which is typically 2.5-3.5 mm wing length (other species can be much larger). Hence, in the images there is a bright background with the mosquitoes appearing as dark images. In the RRS approach there is a double pass of the measurement volume giving increased diffraction which limits the practical depth of field to approximately 2 m.

## 2.2 Signal Processing

In order to interpret mosquito behaviours it is imperative to be able to track them when swooping above or around the bednet as well as when host seeking and probing the net. To form contiguous tracks across all the different areas, a robust segmentation process is needed. When the mosquitoes are in the region above the bednet there is at least 3-5 greyscales difference between the mosquito image and the background. The contrast reduces markedly when the mosquito is either in front or behind the bednet. With the RRS setup the light passes each layer of the bednet twice (see Figure 1) leading to 2-3 greyscales difference between the mosquito and background when the mosquito is in front of the net (closer to the

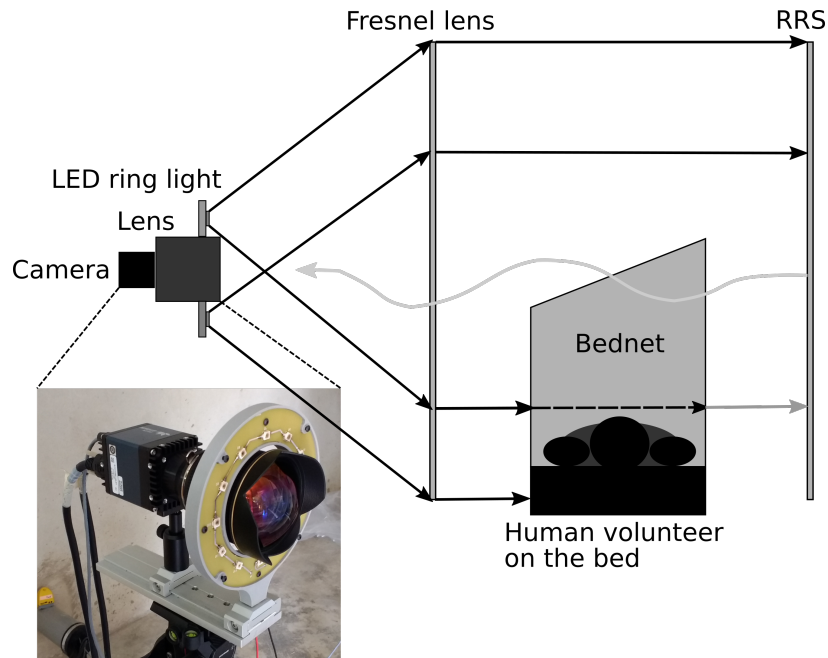

Figure 1: Schematic diagram of the recording system. Inset photograph of the ring light mounted together with the camera on a standard photographic tripod.

Fresnel lens) and about 1-2 greyscales for mosquitoes behind the net. Graphs of the typical intensity distribution around a mosquito image are given in Figure 2 in both 3D (inverted intensity scale) and image formats. Figure 2a shows a typical mosquito shadow image using back-lit imaging when the mosquito is outside the bednet, the corresponding image with RRS imaging is in Figure 2b. Significantly reduced contrast can be seen in Figure 2c which is a back-lit mosquito image from across the bednet and Figure 2d from the RRS approach.

The original approach to segmentation [5] used a difference image between consecutive frames and a single threshold value to identify movement. Whilst developing the RRS system, two issues were found. Firstly, the contrast of a mosquito image in low intensity areas is similar to the camera noise. Secondly, in high intensity regions, the noise level and contrast is higher necessitating a different threshold. Noise reduction is necessary to enable robust thresholding of mosquito images in low intensity areas. Several filter types were considered (Gaussian, median etc) and applied to original or difference images. Using noise reduction effectiveness and computational overhead as criteria, a Gaussian filter applied to the difference image was selected using a 15 x 15 pixel kernel (implemented via the OpenCV library [28]). The width of the Gaussian function is defined by the standard deviation as [28]:

$$\sigma = 0.3 \cdot ((ksize - 1) \cdot 0.5 - 1) + 0.8.$$

The filter values were scaled such that the integral across the whole filter was 1. The typical

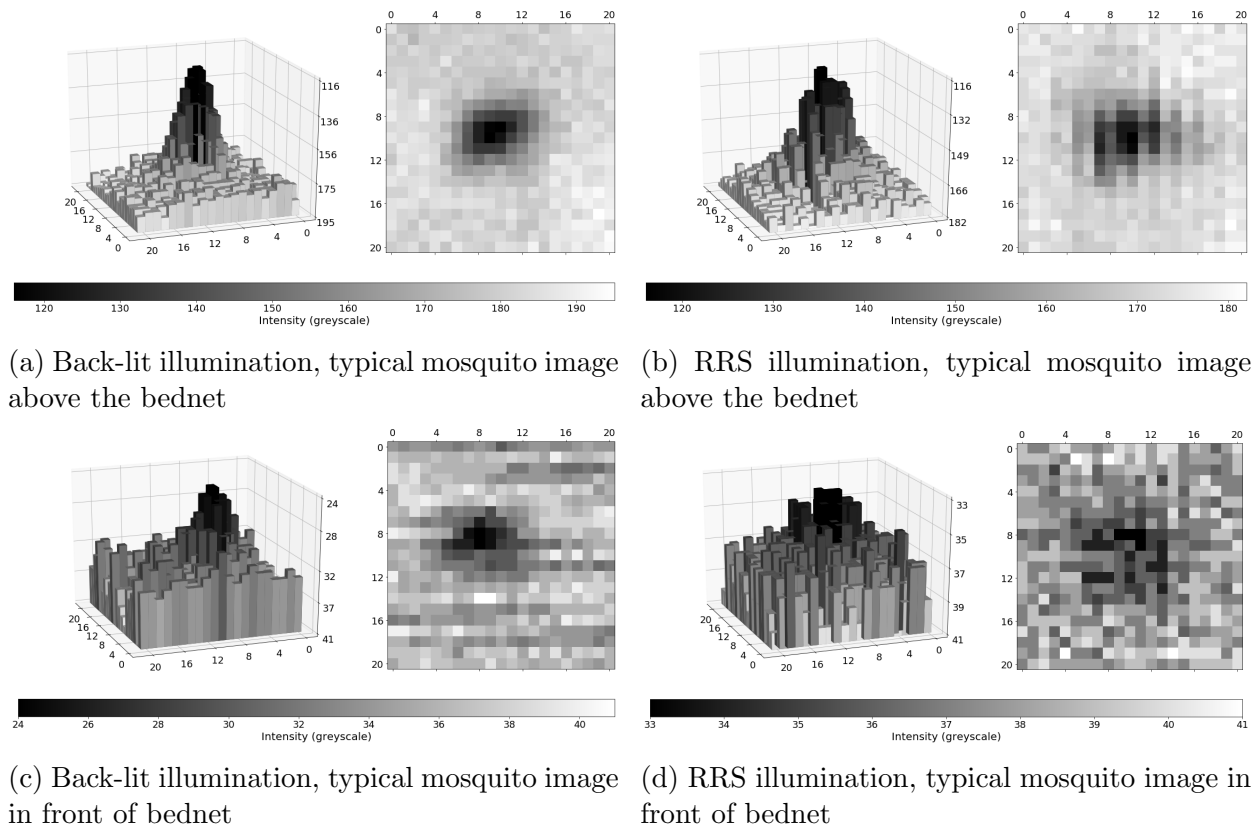

Figure 2: Mosquito intensity distributions under back-lit or RRS illumination and for mosquito positions above the bednet or in front of the bednet. 3D maps use inverted intensity scale.

benefit of the filter can be observed in Figure 3 which shows as red the pixels above a user defined threshold before and after application of the filter, in this example the threshold was 2 greyscales.

To address the need for variations in threshold to segment a mosquito image, the high and low intensity areas can be classified from examination of a normalised histogram. For the RRS system, the greyscale ranges associated with the different regions of the image can be seen in Figure 4b. The two regions of interest for mosquito flight are the background which is above or to the side of the bednet and the bednet region itself, either in front or behind the bednet. A manual definition of the threshold that separates these regions is required to run segmentation algorithm and is typically around 40-60 greyscales and is consistent for both backlit and RRS imaging approaches. It can be seen from Figure 4 that the RRS system gives larger regions of high intensity in the background whereas this region is more widely distributed for the backlit case. The bednet region has a larger greyscale range for

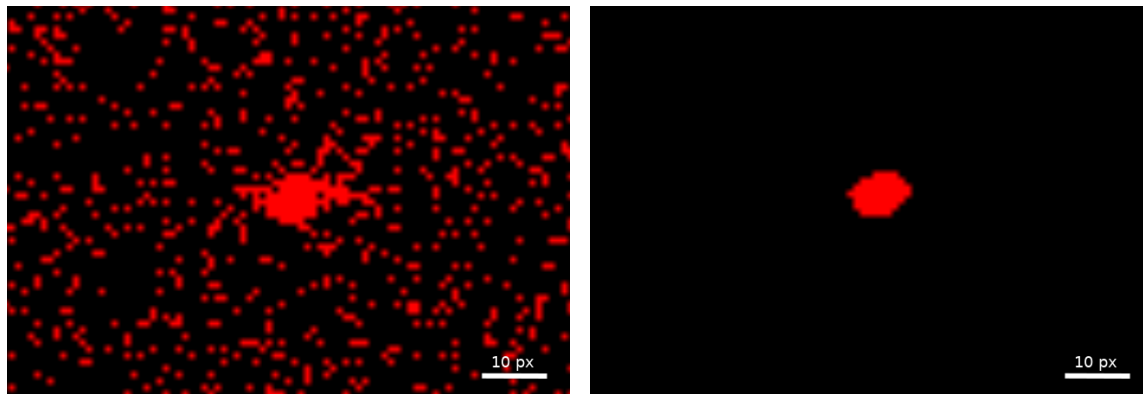

(a) Image before denoising applied.

(b) Image after de-noising, 15 x 15 pixel Gaussian filter, standard deviation 2.6.

Figure 3: The typical effect of de-noising on part of a difference image containing a mosquito image. Both cases show the same part of the frame. The red colour shows differences greater than 2 greyscales.

the backlit system (showing less uniform illumination in the backlit case), but its peak is at a higher greyscale, approximately 40, than for the RRS system. It can also be seen that the darkest regions, corresponding to the human bait are brighter for the RRS by circa 10 greyscales than in the backlit case. This occurs due to the direct front illumination which will also be incident on the mosquitoes and can slightly reduce the contrast in comparison with the background.

The updated segmentation algorithm incorporates the following stages.

1. Form a difference image between the  $n$ th and  $(n-i)$ th images. Typically  $i$  is set to 5 frames to aid discrimination. This produces a pair of detected mosquito images with opposite signs and their separation is the mosquito displacement between the two frames.
2. A large kernel, typically 9 x 9 to 21 x 21 pixel, Gaussian filter is then (optionally) applied to the difference image to reduce noise.
3. For the brighter, background region, the algorithm searches for all regions of positive difference. An image threshold is calculated and applied to segment the mosquito image. Morphological operators can be optionally applied to improve the outer contour of the mosquito image (opening and closing). Statistics are then calculated: the centre co-ordinates, the area, i.e. standard 'blob' analysis. Dilation performed by 5-7 pixels aid the detection of broken down images. Mosquito images are removed with either too large or small area (based on user defined thresholds). The result is a set of candidate



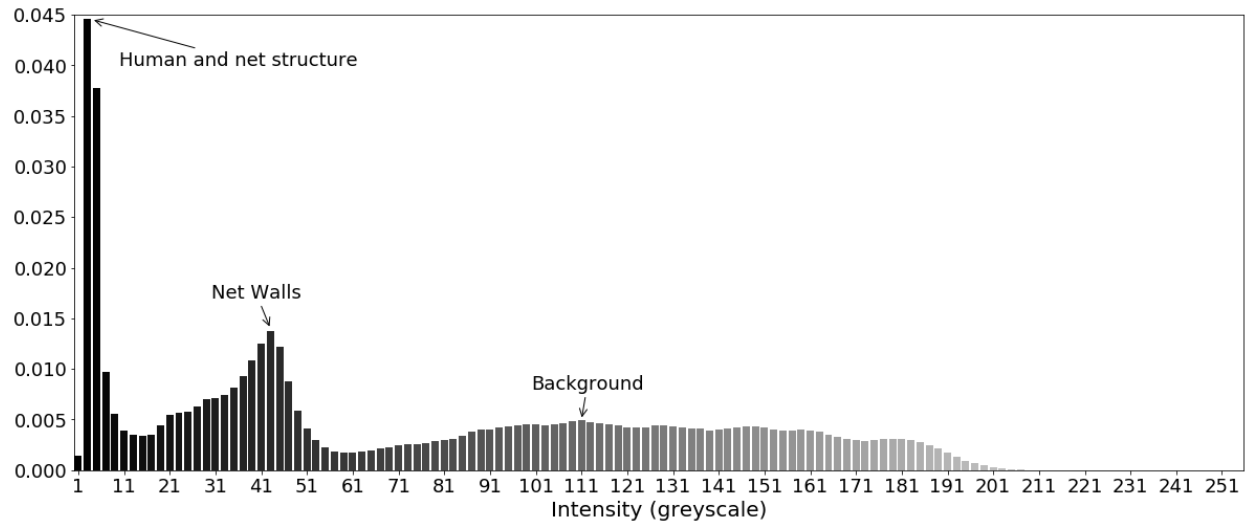

(a) Back-lit image histogram

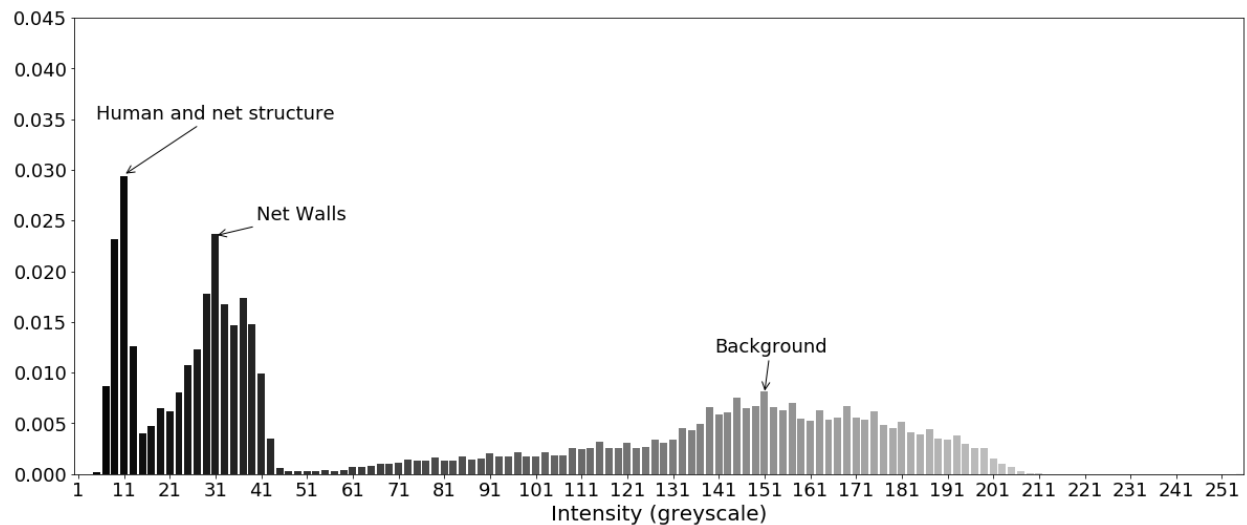

(b) RRS image histogram

Figure 4: Normalised image histograms with different illumination approaches.

mosquito images that satisfy the selection criteria and their positions in the image. The typical threshold used for the brighter areas is 3 greyscales.

4. The process is repeated for the darker image regions containing the bednet. The threshold used to segment the mosquito images tends to be lower at 1 to 2 greyscales.
5. The data from the two passes (the brighter and darker image regions) are then combined together.

Apart from the addition of a Gaussian filter for de-noising and classification of the region to determine the appropriate threshold, the mosquito segmentation algorithm is identical to the one described in [5]. Whilst more complex algorithms could be implemented, the requirement to control the computational overhead was important given the need for operation in the field and on data sets of approximately 2 TB per hour of recording from the two cameras.

## 3 Results and discussion

### 3.1 Evaluation of Illumination quality

Exemplar images from the backlit and RRS illumination systems are given in Figure 5. The ring structure from the pair of Fresnel lenses used in the backlit approach are visible across the image in Figure 5a, whereas this structure is averaged out when a single Fresnel lens is used with the RRS in Figure 5b. The horizontal banding in the RRS image derives from the 50 mm wide adhesive tape obtained from 3M and the reflections from the LED ring light give small localised areas where individual mosquito images cannot be segmented. In the backlit case the roof of the bednet is tilted whereas with RRS the data were obtained using a flat bednet roof. Each figure shows 3 intensity profile graphs in the region above the bednet, i.e. the background. It can be observed that with the RRS the intensity towards the edge and corners of the image is maintained at a higher level, whereas with backlit imaging the intensity drops to  $\approx 50\%$  of the central area. It is clear that in the corners of the frame from the backlit system the illumination level is very similar to that in the middle of the bednet (see Figure 6a). This will cause reduced mosquito detection in the corners of the frame and difficulty in defining a robust threshold.

The ring structure from the two Fresnel lenses can also be seen in the profiles from Figure 5a with backlit imaging and for unstable field recordings can lead to erroneous artefacts in the difference images used for mosquito segmentation.

The temporal stability of the illumination using the bespoke LED ring light source was compared with that of the original single LED used in the original backlit system. Statistical analysis over 250 frames (5 seconds) of data in different parts of the image showed the expected result that the standard deviation and greyscale range increase with mean intensity. The cameras used for backlit imaging and those in the RRS experiments both using the same type of CMOS detectors and gave average levels of 1.84% greyscale standard deviation as a proportion of the mean intensity.

### 3.2 Quantitative performance metrics

The performance of the combined imaging and segmentation algorithms has been quantified using a number of metrics, thus enabling a quantitative comparison of the backlit and RRS

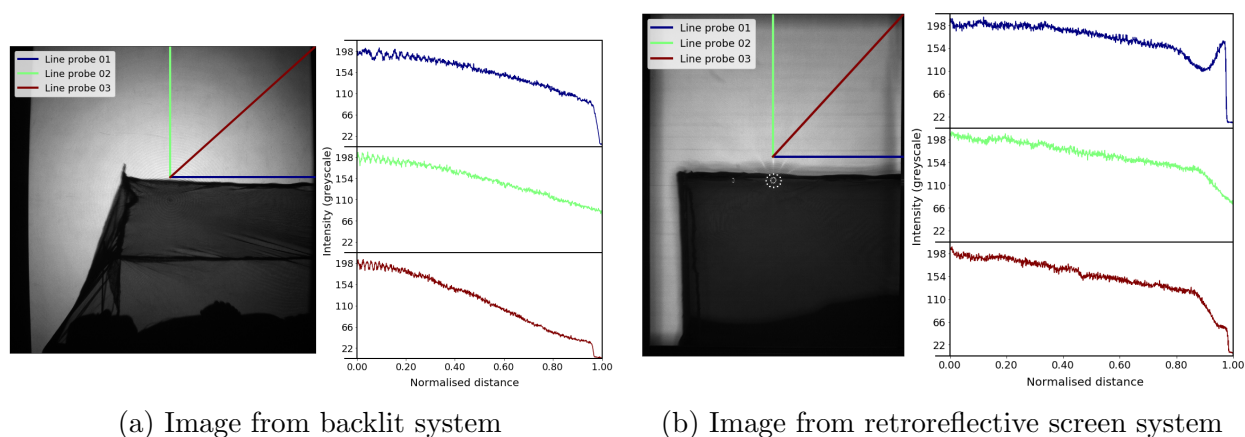

Figure 5: Spatial distribution of light levels across the background of the image along three different directions using line probes. Line probes are parameterised by a coordinate from 0 to 1, where 0 is at the centre of the image and 1 is at the edge.

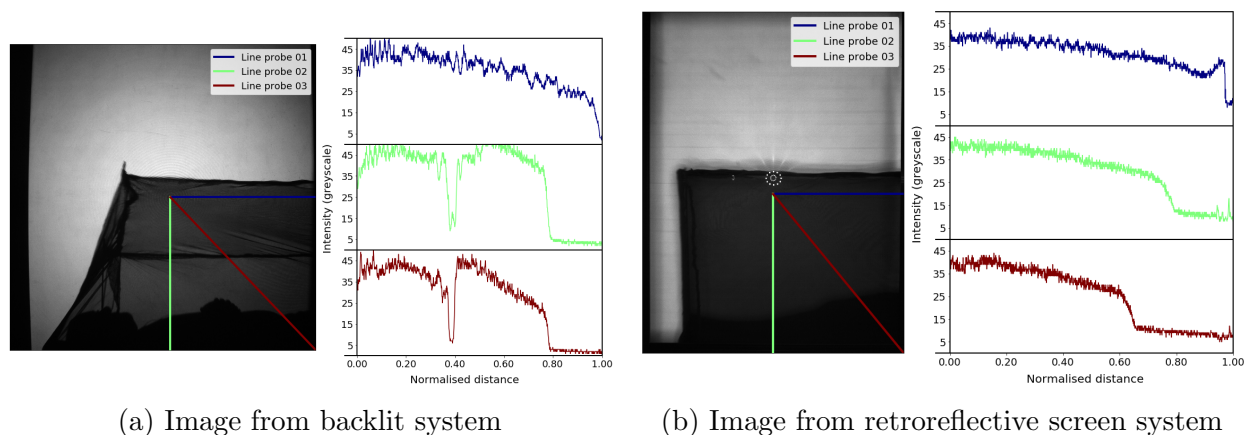

Figure 6: Spatial distribution of light levels across the bednet along three different directions using line probes. Line probes are parameterised by a coordinate from 0 to 1, where 0 is at the centre of the image and 1 is at the edge.

imaging setups. The data are presented in Table 1. Each dataset was obtained from a typical 1 hour recording with the cameras operating at 50 frames per second.

The recording made with backlit system was done using Tiassale strain (an insecticide resistant variety) of *Anopheles gambiae* mosquitoes. There were 25 female mosquitoes, between 3 and 5 day old, unfed and deprived of sugar for 4 hours prior to filming and left to acclimatise in the filming room for 1 hour before testing. The test was conducted within 1-3 hours of the start of scotophase (i.e. their night time). The male human host was clothed, barefoot and lay on its back and as immobile as comfortably possible. This test was done

at 28 degree C and 78% relative humidity (RH).

The recording with RRS system was done using N'guosso strain (an insecticide susceptible variety) of *Anopheles Coluzzi* mosquitoes. There were also 25 mosquitoes, between 3 and 7 days old, deprived of sugar 1 day before and of water 5 hours before testing. Mosquitoes were placed in the room 1 hour before testing to acclimatise. Mosquitoes were kept and the test was done in the same climate, i.e. at  $27 \pm 2$  degrees C and  $70 \pm 10\%$  RH under a 12hr light/12hr dark cycle.

Both tests used modified PermaNet 2.0 LLIN bednets ( $55 \text{ mg/m}^2$  deltamethrin; Vestergaard, Lausanne, Switzerland). The modification involved making the roof tilted, so, that the roof will be visible in the view of the camera. In both cases all mosquitoes were released at the beginning of the test from a cup located 2 metres above the floor and about 1.5 metres from the edge of the bednet.

The same recording (made with RRS recording system) was used for the Figure 8.

It is important to emphasise that the same algorithms have been used to process the recordings from both the backlit and RRS systems (with small variations in parameters to optimise the results). Therefore, differences in performance are due to the optical setup. Notably, the greyscale threshold for detection of mosquito images across the challenging bednet region was the same (1 greyscale). An initial tracking process was performed [5] allowing only a single missing mosquito position within a track and discarding any tracks with less than 5 positions; hence the number of 'detected positions in tracks' in Table 1 is determined. A second tracking iteration enabled existing tracks to be lengthened and tracks to be combined together with gaps of up to 15 frames between consecutive positions in a track.

Any gaps in a track, i.e. where the time between consecutive track positions is a multiple of the inter-frame time,  $\Delta t$ , indicate a missed mosquito position(s). Some missed positions occur as mosquitoes fly across completely occluded areas but others are due to locally poor contrast. The total number of potential positions in a track,  $N_t$ , is calculated from:

$$N_t = \sum_{k=0}^{n-1} \text{Int} \left[ \frac{\Delta t_k}{\Delta t} \right],$$

where  $n$  - number of recorded positions,  $\Delta t_k$  - time difference between the current and previous recorded position,  $\text{Int}[\dots]$  gives the nearest integer value. An individual gap in a track is identified when  $\text{Int} \left[ \frac{\Delta t_k}{\Delta t} - 1 \right] > 0$  and hence the total length of gaps in a track,  $N_{Gaps}$ , is given by:

$$N_{Gaps} = \sum_{k=0}^{n-1} \text{Int} \left[ \frac{\Delta t_k}{\Delta t} - 1 \right],$$

The data in Table 1 provides average and standard deviation of gap size as well as the number of gaps as a proportion of the number of detected positions (to normalise the expected

experimental variability). These metrics are determined for the background (outside the bednet) and the across the bednet regions. Statistics are also given for the average track length and average track length without gaps. The latter is the average length of track pieces without any gaps, i.e. where there is a detected position at every time step. Finally, mosquito detection percentages are given from the ratio between number of detected positions used in tracks and total number of potential positions,  $N_t$ .

Table 1: Performance metrics of mosquito position detection for backlit and retroreflective screen systems.

| Metrics                                     | Systems                      | Backlit [5]      | RRS <sup>1</sup> |
|---------------------------------------------|------------------------------|------------------|------------------|
|                                             | Detected positions in Tracks | 19128            | 22483            |
| Mean $\pm$ SD Gap Size (Frames) Across Net  |                              | 6.88 $\pm$ 11.91 | 4.19 $\pm$ 4.22  |
| Gaps/Positions Ratio Across Net             |                              | 0.066            | 0.018            |
| Mean $\pm$ SD Gap Size (Frames) Outside Net |                              | 4.18 $\pm$ 6.58  | 4.58 $\pm$ 4.62  |
| Gaps/Positions Ratio Outside Net            |                              | 0.036            | 0.017            |
| Average Track Length                        |                              | 78.02            | 77.54            |
| Average Uninterrupted Track Length          |                              | 16.82            | 29.85            |
| Detected Mosquitoes Across Net              |                              | 54%              | 92%              |
| Detected Mosquitoes Outside Net             |                              | 85%              | 92%              |
| Detected Mosquitoes Overall                 |                              | 69%              | 92%              |

### 3.3 Discussion

The rationale for the RRS based imaging system has been described above and it is clear that this approach delivers a smaller operational footprint as well as only needing optical access from one side of the measurement volume. It is worth noting that the backlit system has a very small optical power density where the scene volume was 4.8 m<sup>3</sup> and total light source power output is 0.88 W (for two LEDs), thus, light power density is 0.18 W/m<sup>3</sup>. The new system provides slightly larger scene volume (due to greater height of the Fresnel lenses) of 5.9 m<sup>3</sup>, but light source power output is approx. 12 W (for two LED ring lights) and, thus, the optical power density is 2 W/m<sup>3</sup>. Repeat experiments and rotation of the human bait show that the increased power density from the fixed position of the illumination does not influence the behaviour of the mosquitoes. There are additional benefits in uniformity of

<sup>1</sup>Retroreflective screen system

the illumination into the corners of the measurement volume compared to the backlit setup as evidenced by the spatial distribution data in Figures 5 and 6.

There is the opportunity with more uniform illumination from RRS imaging to raise the light level further without causing saturation of the image in the centre. The 12 LEDs in the ring light are necessarily displaced from the camera lens axis and therefore create collimated beams that traverse the measurement volume at a small angle,  $\approx 4^\circ$ , to the optical axis of the Fresnel lens. This reduces any shadowing caused by other objects, such as the bednet, affecting the image of the mosquitoes. The position and size of the diffuser in the RRS system (being the full aperture RRS itself) gives increased scattering compared to that in the backlit setup. The scatter from the RRS having a larger angular subtense than the propagation directions of the illumination gives a diffuse cone of illumination of  $\approx 10^\circ$ . These effects are probably key to giving increased mosquito segmentation performance over the critical bednet areas, leading to the level of mosquito detection across the bednet for RRS of 92% compared to 54% for backlit imaging (Table 1). The practical benefits are important for ease of use in field settings, e.g. in Banfora, Burkina Faso. The RRS approach requires 2 Fresnel lenses (rather than 4 for the backlit case) and two tripods for the camera-LED assemblies (4 tripods for two cameras and two light sources for backlit). The RRS itself can be assembled in the field from locally sourced plywood sheets and the retro-reflective tape bonded to it.

The performance of the RRS approach to track mosquitoes in front of and behind the bednet has been evaluated in lab experiments where the mosquitoes are released via an aspirator at the specific locations. Segmented and tracked results are given in Figure 7a when the mosquitoes are released in front of the bednet and in Figure 7b where the point of release is behind the bednet. The image of the aspirator at the moment of release is clearly visible on the right edge of each image. Several mosquitoes were released simultaneously in each case. It is clear that mosquitoes located closer to the Fresnel lens (in front of the net) are reliably identified by the segmentation algorithm everywhere – the tracks show a regular spacing of segmented positions. Mosquitoes flying closer to the retroreflective screen (behind the net) are consistently identified above the net and across the vertical net walls. Segmentation performance is slightly worse across the inclined net roof, although most positions are still identified and sufficient to enable flight path tracking. This occurs due to the combination of limited depth of field and additional optical attenuation through the inclined net which gives increased occlusion. Also, at the beginning of the tracks mosquitoes were not identified well because they were blown from the aspirator quite fast (much faster than their natural maximum velocity).

Figure 8 shows identified mosquito positions from both cameras with a human volunteer lying under the net. Qualitative inspection reveals a high level of activity in front and behind the bednet as well as bouncing behaviours particularly evident above the feet of the person (left hand side but with some continuity to the right hand camera view). These data were obtained with Ximea CB120RG-CM cameras. The left hand camera used 5 ms

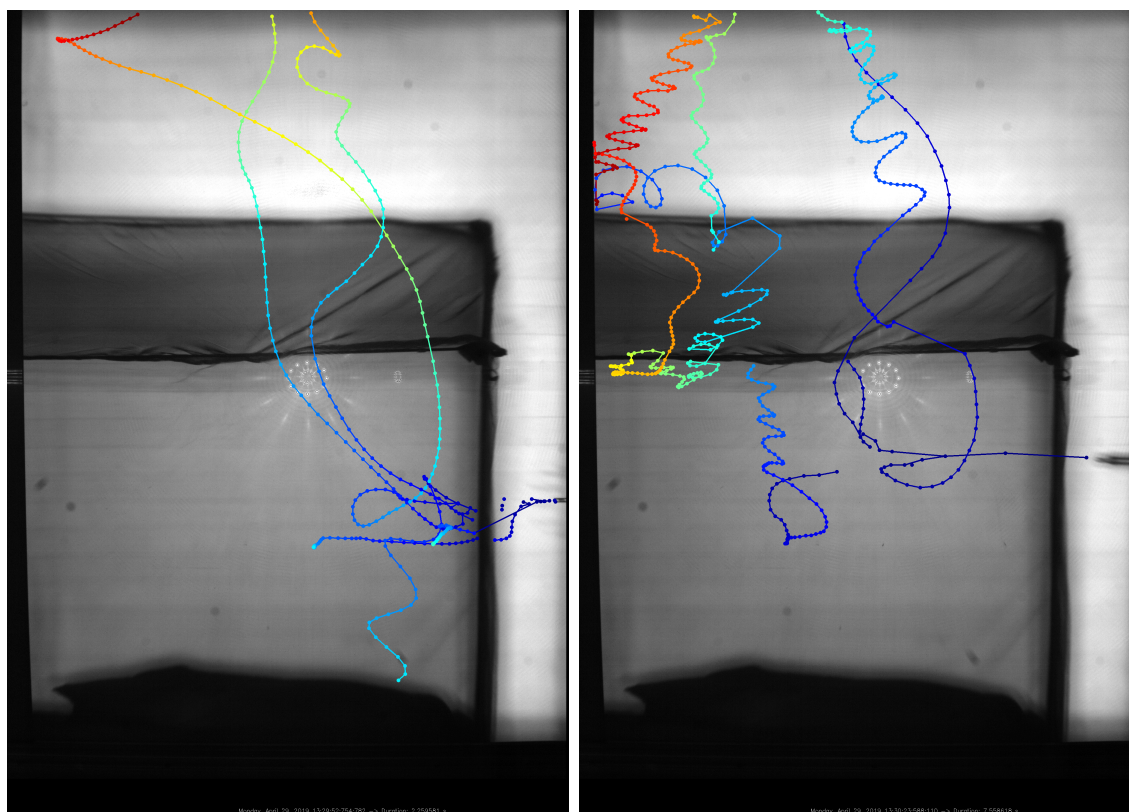

(a) Positions and tracks of mosquitoes flying in front of the bednet. (b) Positions and tracks of mosquitoes flying behind the bednet.

Figure 7: Segmented positions of the mosquitoes and flight tracks released using an aspirator (visible on the right of each frame) specifically in front (a) and behind (b) the bednet.

exposure time with no gain, whereas the right hand camera was used with 5 ms exposure and -3.5 dB gain. The continuity of tracks between the two views reflects the robustness of the segmentation algorithm to these varying conditions. Movement of the volunteer and draughts cause movement of the bednet and the associated strings supporting it and lead to some false segmentation in individual frames that are largely filtered out via the tracking algorithms. Supplementary video file demonstrates short part of the recording, where mosquitoes move from one side to the other and some bouncing activity on the roof of the net.

The quantitative performance metrics presented in Table 1 are from different experiments for the backlit and RRS imaging systems and hence exhibit natural variability due to the use of different mosquitoes and human bait. This is evident in the detected positions in tracks metric which shows that the RRS experiment produced a higher number of segmented mosquito positions that passed the consistency requirements to be part of mosquito flight tracks. The data on gap size in tracks shows that the RRS imaging approach gave similar

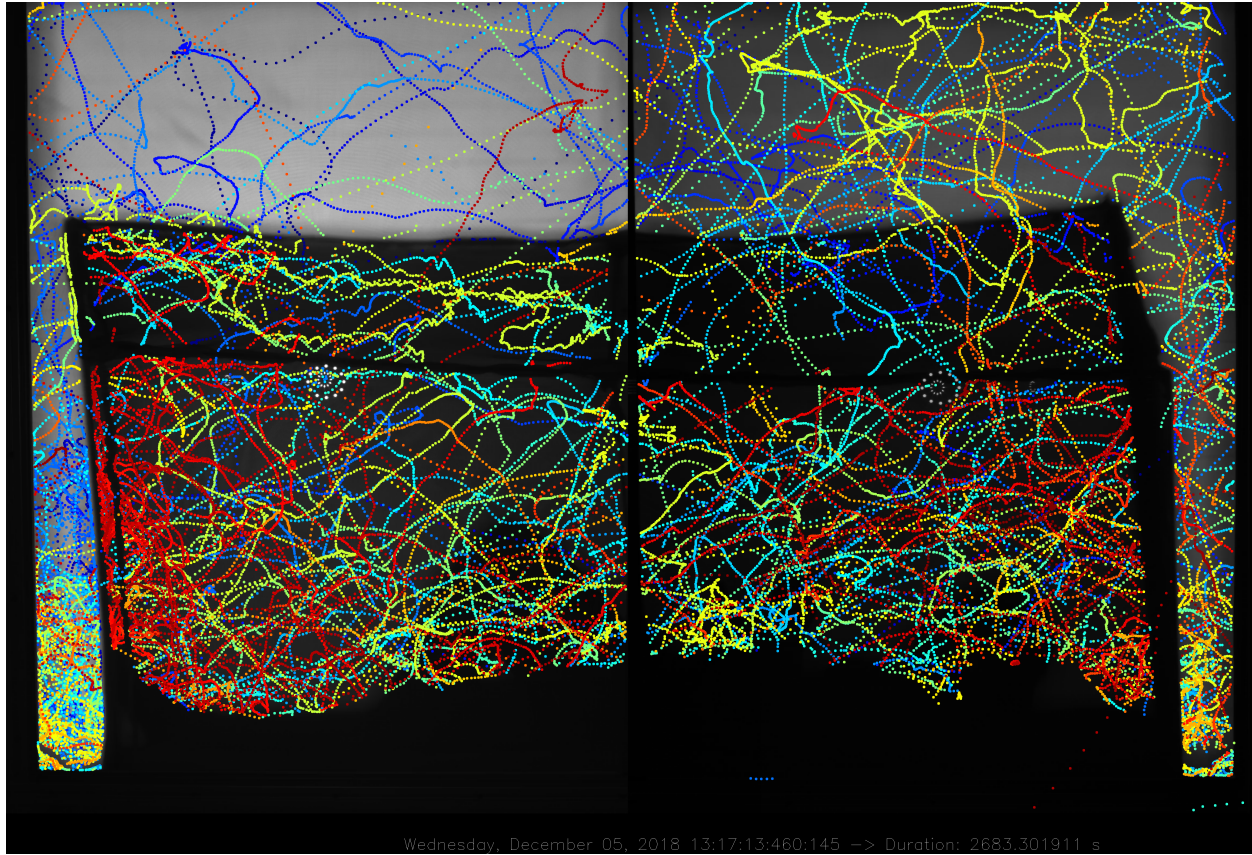

Figure 8: Example of full RRS system segmented recordings using Ximea CB120RG-CM cameras and 5 ms exposure per frame. Left camera, no gain, right camera, -3.5 dB gain.

performance both across net and outside net regions. In contrast the backlit imaging setup gives larger track gaps across the bednet probably due to reduced illumination levels away from the centre of each camera's field of view and the reduced transmission of the bednet in this region. The variability in gap size (given by the standard deviation, SD) is higher for both regions with backlit imaging, but especially so for the across net region. The data for the number of track gaps normalised by the number of detected positions shows similar trends: consistent performance from the RRS setup in both across net and outside net regions and worse metrics with backlit imaging.

The track length data shows that average performance of backlit and RRS imaging systems is similar. However, the uninterrupted track length is significantly greater for RRS than backlit, indicating the higher consistency in segmenting mosquito positions. The mosquito detection percentages show that the RRS imaging approach achieves consistent performance in both across net and outside net regions with detection levels  $\geq 90\%$  that are significantly higher than for backlit imaging. It is worth noting again that the same processing pipeline



was applied to the recordings made with backlit and RRS recording systems. So, the differences are due to the optical setup rather than signal processing. With this improved performance in mosquito image segmentation, the tracking algorithms are able to reliably bridge the gaps in tracks that do occur and hence deliver significantly improved flight tracks for entomologists.

The RRS imaging approach is being used in both field and lab environments to further understand the interaction between bednets and mosquitoes, including the testing of novel designs [4]. In addition, the system is helping the definition of new protocols for commercial bednet assessment. The RRS system has also been applied to a new study to assess the variation on attractiveness of individuals to mosquitoes. The experimental design is to have two people within the field of view but seated separately. Host seeking mosquitoes respond to the person giving off higher levels of attractant and then blood feed. An initial image showing segmented mosquitoes is given in Figure 9. In this example, the individual on the left hand side is clearly more attractive to mosquitoes than that on the right, with several mosquitoes exhibiting bouncing type behaviour in identifying a location to blood feed. This type of experiment could be extended to evaluate the performance of repellents and other interventions.

## 4 Conclusions

The introduction of a retro-reflective screen to large volume, human baited mosquito tracking studies delivers significant improvements to mosquito detection rates in comparison to previous backlit imaging approaches. This is primarily due to increased uniformity of illumination and the narrow angle diffuse nature of the reflected light from the RRS. A disadvantage of RRS imaging is that the light double passes each bednet layer that is typically (although, not necessarily) the focus of the experiments, reducing the available light intensity. However, the use of large kernel Gaussian noise reduction filters combined with low detection thresholds of 1 to 2 greyscales have been shown to give robust mosquito detection. With RRS imaging, mosquito detection rates of 92% have been obtained, compared to an average of 69% with backlit imaging.

There are further practical benefits of the RRS imaging setup in terms of reduced footprint, reduced number of optical components required and reduced sensitivity to misalignment due to the retro-reflective nature of the material.

RRS based imaging setups are a powerful tool in entomological research, especially for species like the *Anopheles* mosquitoes that transmit malaria, nocturnally active mosquitoes that require remote detection as their natural behaviour is influenced by the presence of a human observer. RRS systems are installed in research laboratories in the UK and Burkina Faso, where the insight they provided on malaria vector behaviour led directly to novel next-generation bednet designs and an innovative solution to the threat from insecticide resistance

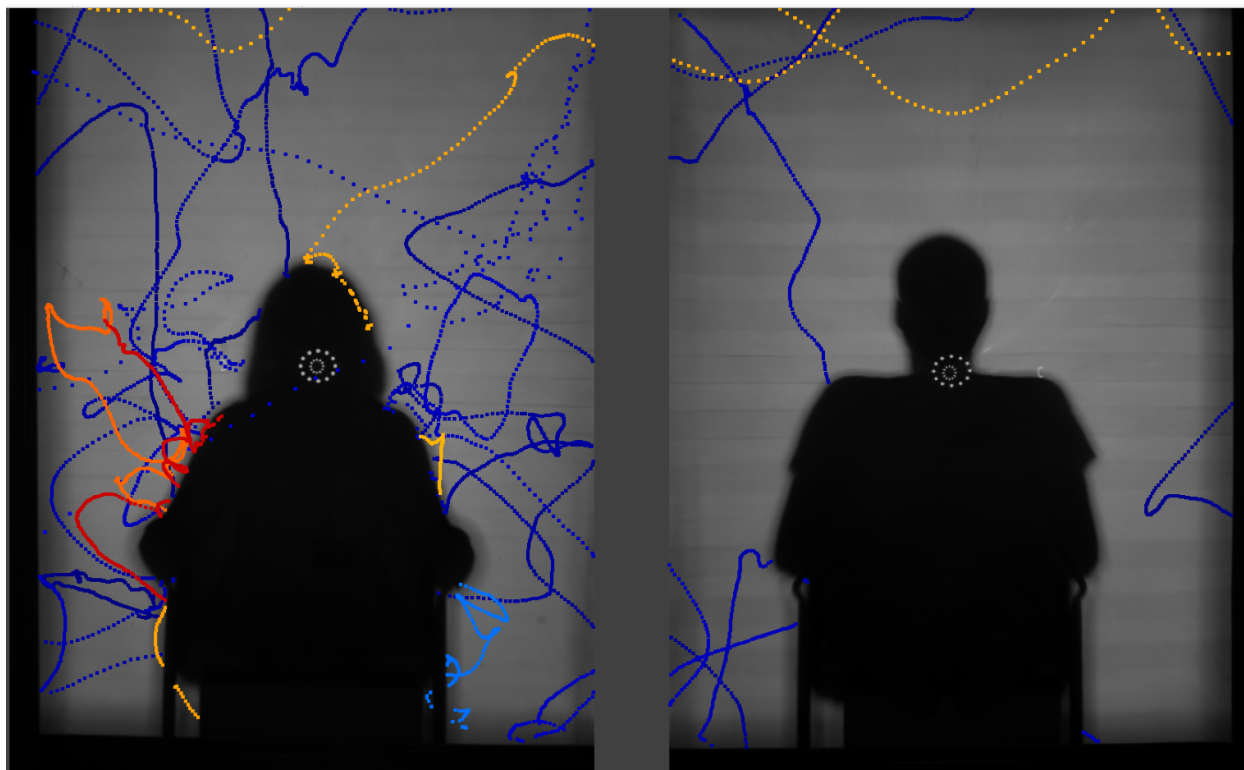

Figure 9: Exemplar image captured using the RRS recording system described herein, showing 10 minutes flight activity by 10 *Anopheles gambiae s.l.* females around two seated adults. Higher flight activity is apparent at the person on the left.

[29].

## Acknowledgements

The authors would like to thank the volunteer sleepers both in the laboratory in Liverpool and in the field in Burkina Faso and are especially grateful to the community at Tengrela, Burkina Faso, who continue to support studies at their village. Also, the authors are very grateful for all constructive comments from the reviewers, which greatly helped to improve the paper.

## Ethics

All research methods were performed in accordance with approved guidelines for those procedures and written informed consent was obtained from all volunteer subjects. Video recording

work was approved by the Research Ethics Committees at the Liverpool School of Tropical Medicine (LSTM Research Protocol 16-38, 11 October 2016, Liverpool) and Centre National de Recherche et de Formation sur le Paludisme (CNRFP Deliberation no. 2016-9-097, 20 September 2016, Ouagadougou). No adverse effects of treatment or mosquito-borne infections were reported by volunteers during the course of the study.

## Data, code and material

All custom codes (not already published elsewhere) and all data used in this work are available at [30] and larger datasets used for illumination analysis are available at [31].

## Competing interests

The authors declare no competing interests.

## Funding

This research was supported with funding from the UK Medical Research Council (MRC) and the UK Department for International Development (DFID) under the MRC/DFID Concordat agreement (MR/M011941/1), a Wellcome Trust Collaborative Award (Malaria in Insecticide Resistant Africa MiRA; 200222/Z/15/Z) and the Bill & Melinda Gates Foundation (OPP1159078).

## Authors contributions

C.K., D.P.T., C.E.T. and V.V. conceived the idea of the improved system. V.V., C.K. and C.S. developed the new system and did initial testing. P.J.M. and G.M. gave advice on specifics of entomological use and field conditions for the system. G.M. and V.V. setup both field and lab based systems and did initial testing of the system at the field site. G.M. collected field test data, whereas A.G. collected test data from lab based system. C.K., C.S., and V.V. did initial pre-processing and initial assessment of the collected data. V.V. together with C.K., C.E.T., and D.P.T. developed and implemented assessment metrics and methods. C.K. with the help of C.S., C.E.T., D.P.T., and V.V. devised and implemented improvements to the segmentation algorithm. V.V. with the help of C.K. and C.S. ran the performance analysis. V.V., C.K., C.E.T. and D.P.T. wrote the paper with contributions from P.J.M. All authors approved the final submitted version.

## References

- [1] Parker JEA, Angarita-Jaimes N, Abe M, Towers CE, Towers D, McCall PJ. Infrared video tracking of *Anopheles gambiae* at insecticide-treated bed nets reveals rapid decisive impact after brief localised net contact. *Sci Rep.* 2015;5. Available from: <https://doi.org/10.1038/srep13392>.
- [2] Parker JEA, Angarita Jaimes NC, Gleave K, Mashauri F, Abe M, Martine J, et al. Host-seeking activity of a Tanzanian population of *Anopheles arabiensis* at an insecticide treated bed net. *Malar J.* 2017;16. Available from: <https://doi.org/10.1186/s12936-017-1909-6>.
- [3] malERA Consultative Group on Vector Control T. A Research Agenda for Malaria Eradication: Vector Control. *PLOS Medicine.* 2011 01;8(1):1–8. Available from: <https://doi.org/10.1371/journal.pmed.1000401>.
- [4] Murray G, Lissenden N, Jones J, Voloshin V, Toé H, Sherrard-Smith E, et al. Novel bednet design targets malaria vectors and expands the range of usable insecticides. *Nature Microbiology.* 2019;Accepted for publication.
- [5] Angarita-Jaimes NC, Parker JEA, Abe M, Mashauri F, Martine J, Towers CE. A novel video-tracking system to quantify the behaviour of nocturnal mosquitoes attacking human hosts in the field. *J R Soc Interface.* 2016;13. Available from: <https://doi.org/10.1098/rsif.2015.0974>.
- [6] Gibson G. A behavioural test of the sensitivity of a nocturnal mosquito, *Anopheles gambiae*, to dim white, red and infra-red light. *Physiol Entomol.* 1995;20. Available from: <https://doi.org/10.1111/j.1365-3032.1995.tb00005.x>.
- [7] Spitzen J, Takken W. Keeping track of mosquitoes: a review of tools to track, record and analyse mosquito flight. *Parasites & Vectors.* 2018 Mar;11(1):123. Available from: <https://doi.org/10.1186/s13071-018-2735-6>.
- [8] Huho B, Briët O, Seyoum A, Sikaala C, Bayoh N, Gimnig J, et al. Consistently high estimates for the proportion of human exposure to malaria vector populations occurring indoors in rural Africa. *International Journal of Epidemiology.* 2013 02;42(1):235–247. Available from: <https://doi.org/10.1093/ije/dys214>.
- [9] Bayoh MN, Walker ED, Kosgei J, Ombok M, Olang GB, Githeko AK, et al. Persistently high estimates of late night, indoor exposure to malaria vectors despite high coverage of insecticide treated nets. *Parasites & Vectors.* 2014 Aug;7(1):380. Available from: <https://doi.org/10.1186/1756-3305-7-380>.

- [10] Takken W, Klowden MJ, Chambers GM. Articles: Effect of Body Size on Host Seeking and Blood Meal Utilization in *Anopheles gambiae sensu stricto* (Diptera: Culicidae): the Disadvantage of Being Small. *Journal of Medical Entomology*. 1998 09;35(5):639–645. Available from: <https://doi.org/10.1093/jmedent/35.5.639>.
- [11] Butail S, Manoukis N, Diallo M, Ribeiro JM, Lehmann T, Paley DA. Reconstructing the flight kinematics of swarming and mating in wild mosquitoes. *J R Soc Interface*. 2012;9. Available from: <https://doi.org/10.1098/rsif.2012.0150>.
- [12] Manoukis NC, Butail S, Diallo M, Ribeiro JMC, Paley DA. Stereoscopic video analysis of *Anopheles gambiae* behavior in the field: Challenges and opportunities. *Acta Tropica*. 2014;132:S80 – S85. Available from: <http://www.sciencedirect.com/science/article/pii/S0001706X13001769>.
- [13] Hawkes F, Gibson G. Seeing is believing: the nocturnal malarial mosquito *Anopheles coluzzii* responds to visual host-cues when odour indicates a host is nearby. *Parasit Vectors*. 2016;9. Available from: <https://doi.org/10.1186/s13071-016-1609-z>.
- [14] World Health Organisation: World Malaria Report, WHO, Geneva; 2018. Available from: <https://www.who.int/malaria/publications/world-malaria-report-2018/en/>.
- [15] Back Malaria Partnership. Global Malaria Action Plan, WHO, Geneva; 2008. Available from: <http://archiverbm.rollbackmalaria.org/gmap/gmap.pdf>.
- [16] Butail S, Manoukis N, Diallo M, Yaro AS, Dao A, Traoré SF, et al. 3D Tracking of Mating Events in Wild Swarms of the Malaria Mosquito *Anopheles gambiae*. *Conf Proc IEEE Eng Med Biol Soc*. 2011;.
- [17] Butail S, Manoukis NC, Diallo M, Ribeiro JMC, Paley DA. The dance of male *Anopheles gambiae* in wild mating swarms. *J Med Entomol*. 2013;50. Available from: <https://doi.org/10.1603/ME12251>.
- [18] Mendikute A, Yagüe-Fabra JA, Zatarain M, Bertelsen Á, Leizea I. Self-calibrated in-process photogrammetry for large raw part measurement and alignment before machining. *Sensors*. 2017;17(9):2066.
- [19] Towers CE, Towers DP, Jones JD. Optimum frequency selection in multifrequency interferometry. *Optics letters*. 2003;28(11):887–889.
- [20] McCall PJ. Mosquito bed net assembly; 2014. Patent number EP3062663B1. Available from: <https://patents.google.com/patent/EP3062663B1/en>.

- [21] QIU YT, SMALLEGANGE RC, VAN LOON JJA, TER BRAAK CJF, TAKKEN W. Interindividual variation in the attractiveness of human odours to the malaria mosquito *Anopheles gambiae* s. s. *Medical and Veterinary Entomology*. 2006;20(3):280–287. Available from: <https://onlinelibrary.wiley.com/doi/abs/10.1111/j.1365-2915.2006.00627.x>.
- [22] Fernández-Grandon GM, Gezan SA, Armour JAL, Pickett JA, Logan JG. Heritability of Attractiveness to Mosquitoes. *PLOS ONE*. 2015 04;10(4):1–10. Available from: <https://doi.org/10.1371/journal.pone.0122716>.
- [23] Logan JG, Stanczyk NM, Hassanali A, Kemei J, Santana AE, Ribeiro KA, et al. Arm-in-cage testing of natural human-derived mosquito repellents. *Malaria journal*. 2010;9(1):239.
- [24] Organization WH, et al. Guidelines for efficacy testing of mosquito repellents for human skin. Geneva: World Health Organization; 2009.
- [25] 3M™ ScotchLite™ High Gain Reflective Sheeting; 2015. Available from: <http://multimedia.3m.com/mws/media/10472160/3m-scotchlite-high-grain-reflective-sheeting-7610.pdf>.
- [26] Kröner C, Towers CE, Angarita-Jaimes N, Parker JEA, McCall P, Towers DP. 3D tracking of mosquitoes: A field compatible technique to understand malaria vector behaviour; 2016. Heidelberg, Germany.
- [27] OSRAM™ Platinum DRAGON®, SFH 4235; 2018. Available from: [https://www.osram.com/ecat/Platinum%20DRAGON%c2%ae%20SFH%204235/com/en/class\\_pim\\_web\\_catalog\\_103489/global/prd\\_pim\\_device\\_2219732/](https://www.osram.com/ecat/Platinum%20DRAGON%c2%ae%20SFH%204235/com/en/class_pim_web_catalog_103489/global/prd_pim_device_2219732/).
- [28] Bradski G. The OpenCV Library. *Dr Dobb's Journal of Software Tools*. 2000;.
- [29] Murray GPD, Lissenden N, Jones J, Voloshin V, Toé KH, Sherrard-Smith E, et al. Barrier bednets target malaria vectors and increase insecticide options for managing resistance. *Nature Microbiology*. 2019;Submitted.
- [30] Github repository with all custom code and data;. Available from: <https://github.com/Pigrenok/TrackingPerformance>.
- [31] Two StreamPix Sequence v.5 files, which contains dataset used for illumination analysis;. Doi: 10.6084/m9.figshare.8534057.
